# Supplementary figures and images for: Effect of resistance training on HbA1c in adults with type 2 diabetes mellitus and the moderating effect of changes in muscular strength: a systematic review and meta-analysis
Source: HighWire-hosted journal article supplement (doi:10.1136/bmjdrc-2021-002595), 2022-03-01

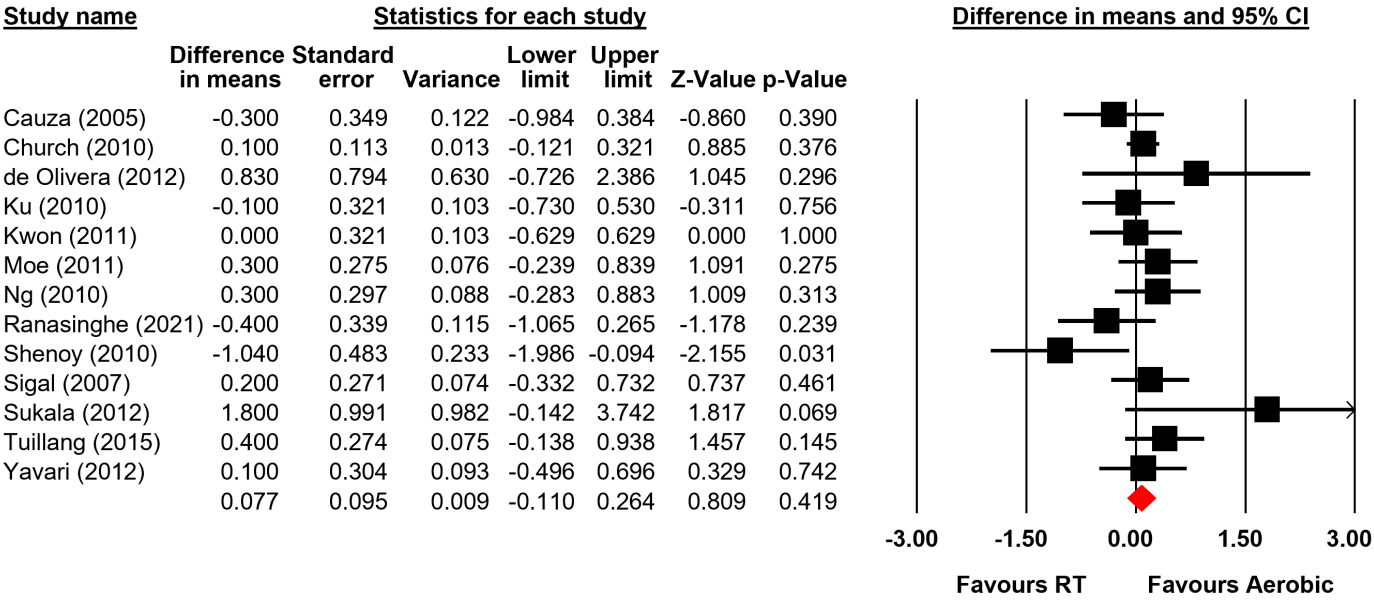

Supplement: bmjdrc-2021-002595supp005_data_supplement.pdf [file bmjdrc-2021-002595supp005_data_supplement.pdf]
